# Supplementary material for: Smc5/6 in the rDNA modulates lifespan independently of Fob1​
Source: PubMed Central journal article supplement (PMC8208791; doi:10.1111/acel.13373), 2021-05-12
Supplement: ACEL-20-e13373-s001.pdf [file ACEL-20-e13373-s001.pdf]

## SUPPLEMENTAL INFORMATION

Supplemental information includes 3 tables and 6 figures and can be found with this article. Yeast strains used in this study are listed in Table S1. Details of plasmids and primers used in this study are specified in Table S2 and S3.

Table S1: Strains used in this study

| <i>Strain</i> | <i>Genotype</i>                                                                                 | <i>Source</i>            |
|---------------|-------------------------------------------------------------------------------------------------|--------------------------|
| JC470         | <i>MAT<math>\alpha</math> ade2-1 trp1-1 his3-11 his3-15 ura3-1 leu2-3 leu2-112 Rad5+ (W303)</i> | R. Rothstein             |
| JC471         | <i>MAT<math>\alpha</math> ade2-1 trp1-1 his3-11 his3-15 ura3-1 leu2-3 leu2-112 Rad5+ (W303)</i> | R. Rothstein             |
| JC1280        | <i>MAT<math>\alpha</math> his3 trp1 ura3-52 leu2::proLEU2-lexAop6</i>                           | Golemis, et al, 1996     |
| JC1358        | JC471 with <i>smc6-9::KanMX6</i>                                                                | C. Boone Lab             |
| JC1594        | JC470 with <i>Smc6-6HIS-3FLAG::KanMX4</i>                                                       | Bustard et al., 2012     |
| JC1595        | JC471 with <i>Smc6-6HIS-3FLAG::KanMX4</i>                                                       | this study               |
| JC3032        | JC471 with <i>nse3-1::HYG</i>                                                                   | Moradi-Fard et al., 2016 |
| JC3039        | JC470 with <i>smc6-9::KanMX6</i>                                                                | this study               |
| JC3078        | JC1595 with <i>nse3-1::URA3</i>                                                                 | this study               |
| JC3084        | JC470 with <i>nse3-1::URA3</i>                                                                  | this study               |
| JC3467        | JC470 with <i>Smc5-13MYC::KanMX6</i>                                                            | this study               |
| JC3483        | JC3467 with <i>nse3-1::URA3</i>                                                                 | this study               |
| JC 3728       | JC470 with <i>Smc5-6HIS-3FLAG::KanMX4</i>                                                       | this study               |
| JC3787        | JC470 with <i>sir2::TRP1, nse3-1::HYG</i>                                                       | this study               |
| JC3790        | JC471 with <i>lrs4::KanMX6</i>                                                                  | this study               |
| JC3791        | JC470 with <i>lrs4::KanMX6</i>                                                                  | K. Mekhail lab           |
| JC3796        | JC3791 with <i>nse3-1::HYG</i>                                                                  | this study               |
| JC4022        | JC470 with <i>Heh1-13MYC::KanMX6</i>                                                            | this study               |
| JC4107        | JC470 with <i>Heh1-TAP::TRP1, TELVR::ADE2</i>                                                   | K. Mekhail lab           |
| JC4205        | JC1595 with <i>heh1::HYG</i>                                                                    | this study               |
| JC4224        | JC471 with <i>Heh1-13MYC::KanMX6</i>                                                            | this study               |
| JC4228        | JC4022 with <i>nse3-1::HYG</i>                                                                  | this study               |
| JC4233        | JC471 with <i>Csm1-TAP::TRP1</i>                                                                | K. Mekhail lab           |
| JC4243        | JC1595 with <i>csm1::KanMX6</i>                                                                 | this study               |
| JC4251        | JC4233 with <i>nse3-1::HYG</i>                                                                  | this study               |
| JC4595        | JC3032 with <i>fob1::HIS3</i>                                                                   | this study               |
| JC4598        | JC1594 with <i>Csm1-TAP::TRP1</i>                                                               | this study               |
| JC4648        | JC471 with <i>sir2::TRP1</i>                                                                    | this study               |
| JC4676        | JC471 with <i>Nup49-GFP, Nop1-CFP::URA3</i>                                                     | this study               |
| JC4699        | JC1595 with <i>sir2::TRP1</i>                                                                   | this study               |
| JC4712        | JC4598 with <i>nse3-1::HYG</i>                                                                  | this study               |
| JC4729        | JC470 with <i>Nup49-GFP, Nop1-CFP::URA3, nse3-1::HYG</i>                                        | this study               |
| JC4731        | JC4676 with <i>lrs4::KanMX6</i>                                                                 | this study               |
| JC4733        | JC4676 with <i>sir2::TRP1</i>                                                                   | this study               |
| JC4735        | JC4676 with <i>heh1::HYG</i>                                                                    | this study               |
| JC4773        | JC4774 with <i>nse3-1::HYG</i>                                                                  | this study               |
| JC4774        | JC4224 with <i>Csm1-TAP::TRP1</i>                                                               | this study               |
| JC4811        | JC1595 with <i>Heh1-TAP::TRP1</i>                                                               | this study               |
| JC4813        | JC4811 with <i>nse3-1::URA3</i>                                                                 | this study               |
| JC4823        | JC3039 with <i>fob1::LEU2</i>                                                                   | this study               |
| JC4824        | JC1358 with <i>fob1::LEU2</i>                                                                   | this study               |
| JC4825        | JC471 with <i>fob1::LEU2</i>                                                                    | this study               |
| JC4929        | JC4824 with <i>Csm1-TAP::TRP1</i>                                                               | this study               |
| JC4932        | JC4676 with <i>smc6-9::KanMX6</i>                                                               | this study               |
| JC4937        | JC4233 with <i>fob1::LEU2</i>                                                                   | this study               |

|        |                                               |            |
|--------|-----------------------------------------------|------------|
| JC4938 | JC4233 with <i>smc6-9::KanMX6</i>             | this study |
| JC4940 | JC4022 with <i>fob1::LEU2</i>                 | this study |
| JC4942 | JC4022 with <i>smc6-9::KanMX6</i>             | this study |
| JC4943 | JC4022 with <i>smc6-9::KanMX6, fob1::LEU2</i> | this study |
| JC4973 | JC4233 with <i>fob1::LEU2, nse3-1::HYG</i>    | this study |
| JC4975 | JC4022 with <i>fob1::LEU2, nse3-1::HYG</i>    | this study |
| JC4976 | JC1358 with <i>lrs4::KanMX6</i>               | this study |
| JC4978 | JC1358 with <i>sir2::HIS3</i>                 | this study |
| JC4979 | JC3790 with <i>sir2::HIS3</i>                 | this study |
| JC4980 | JC4979 with <i>nse3-1::HYG</i>                | this study |
| JC4985 | JC5016 with <i>fob1::LEU2</i>                 | this study |
| JC5007 | JC471 with Fob1-3HA:: <i>HIS3</i>             | this study |
| JC5008 | JC5007 with <i>nse3-1::HYG</i>                | this study |
| JC5010 | JC5007 with <i>smc6-9::KanMX6</i>             | this study |
| JC5014 | JC5016 with <i>smc6-9::KanMX6</i>             | this study |
| JC5015 | JC5016 with <i>nse3-1::HYG</i>                | this study |
| JC5016 | JC471 with Nop1-CFP:: <i>URA3</i>             | this study |
| JC5017 | JC5016 with <i>sir2::TRP1</i>                 | this study |
| JC5018 | JC5016 with <i>heh1::HYG</i>                  | this study |
| JC5019 | JC5016 with <i>lrs4::KanMX6</i>               | this study |
| JC5039 | JC3467 with <i>smc6-9::KanMX6</i>             | this study |
| JC5040 | JC5039 with <i>fob1::LEU2</i>                 | this study |
| JC5041 | JC3467 with <i>fob1::LEU2</i>                 | this study |
| JC5044 | JC3483 with <i>fob1::LEU2</i>                 | this study |
| JC5110 | JC5015 with <i>fob1::HIS3</i>                 | this study |
| JC5113 | JC5014 with <i>fob1::HIS3</i>                 | this study |
| JC5879 | JC3728 with <i>nse3-1::HYG</i>                | this study |
| JC5882 | JC3032 with <i>fob1::HIS3</i>                 | this study |
| JC5883 | JC470 with <i>nse3-1::HYG, fob1::HIS3</i>     | this study |
| JC5894 | JC3728 with <i>smc6-9::KanMX6</i>             | this study |

Table S2: Oligos used in this study

| <i>Primer name</i> | <i>Primer number</i> | <i>Sequence 5'&gt; 3'</i>                          |
|--------------------|----------------------|----------------------------------------------------|
| NTS1               | C1577                | AGGGCTTTCACAAAGCTTCC                               |
|                    | C1578                | TCCCCACTGTTCCTACTGTTCA                             |
| NTS2               | C1795                | CCACCACACTCCTACCAATAAC                             |
|                    | C1796                | AGGTAGTCAGATGAAAGATGAATAGAC                        |
| P1                 | C1791                | CACACTATCATCCTCATCGTATATT                          |
|                    | C1792                | AGAGAGAAGTAGACTGAACAAGT                            |
| P2                 | C1799                | ACGATGAGAGACTGTTCAAGTTAAA                          |
|                    | C1800                | GGGTTGATGCGTATTGAGAGATA                            |
| P3                 | C1801                | CCAATTGTTCCCTCGTTAAGGTATTT                         |
|                    | C1802                | ATTCAGGGAGGTAGTGACAATAAA                           |
| P4                 | C1807                | GTTTGAGAATAGGTCAAGGTCATTTT                         |
|                    | C1808                | GTTTCCCTCAGGATAGCAGAAG                             |
| ZN                 | C1275                | GCACTTAATTGGCGTAAGCTG                              |
|                    | C1276                | TCGCAGGAGCATATTTTCGTA                              |
| Act1               | C1561                | TGTCCTTGTACTCTTCCGGT                               |
|                    | C1562                | CCGGCCAAATCGATTCTCAA                               |
| Smc5               | C1483                | GATCCCATGGATGACCAGTCTAATAGATTTGGGCAGATATG          |
|                    | C1484                | GATCCTCGAGTTAATCGAATGAGTAGTTAGAAGTTTCACCG          |
| Nse1               | C719                 | CTAGGAATTCATGGAGGTACATGAAGAGC                      |
|                    | C720                 | CTAGCTCGAGTTAAATAACGTATACGCCCTCTG                  |
| Nse3               | C723                 | CTAGGAATTCATGAGTTCTATAGATAATGAC                    |
|                    | C724                 | CTAGCTCGAGCTATATAGAATATGAATCGCC                    |
| Nse4               | C721                 | CTAGGAATTCATGTCTAGTACAGTAATATC                     |
|                    | C722                 | CTAGCTCGAGTAAGAATGGTGAAGTGATGTTG                   |
| Nse6<br>(pJ1493)   | C609                 | GATCGGATCCGTGTCAAAATGGGAAGCGTGAACATCATCACCG        |
|                    | C610                 | GATCCTCGAGCAGATCAATGTTTCAGTCATCATGACTGTTACC TG     |
| Nse6<br>(pJ965)    | C892                 | GATCGGATCCAAATGGGAAGCGTGAACATCATCACCG              |
|                    | C610                 | GATCCTCGAGCAGATCAATGTTTCAGTCATCATGACTGTTACC TG     |
| Csm1               | C1737                | GATC GAATTC ATGGATCCATTGACTGTATACAAAACTCAGTGAAACA  |
|                    | C1738                | GATC CTCGAG TTATGTAGCAGCTTACTCGGTTTCATCTTTTTTCTCTC |
| Lrs4               | C1735                | GATCGAATTCATGGAGCATGTAGATTCCGATTTTGCACCTATAAGGAG   |
|                    | C1736                | GATC CTCGAG GATAGCTGTTACTCATACAACTCGTCAACATTTAAAT  |
| Heh1               | C1898                | GATCGCGCCGCATGAATAGTGACTTGGAGTATTTAGAGGACGGTTTTGA  |
|                    | C1915                | GATCCTCGAGTCATTTTGTGGGTTATATTTTGTTTTCAGCGGAATCCT   |

Table S3: Plasmids Used in this study

| <i>Plasmid number</i> | <i>Plasmid description</i>              | <i>Source</i>       |
|-----------------------|-----------------------------------------|---------------------|
| J 965                 | pGAL-lexA                               | S. Gasser lab       |
| J 1493                | pJG4-6                                  | S. Gasser lab       |
| J 359                 | pSH18-34 lexAGal1-lacZ                  |                     |
| J 1805                | J 965 with Nse1                         |                     |
| J 102                 | J 965 with Mms21                        |                     |
| J 138                 | J 965 with Nse3                         |                     |
| J 1804                | J 965 with Nse4                         |                     |
| J 038                 | J 965 with Nse5                         |                     |
| J 141                 | J 965 with Nse6                         |                     |
| J1902                 | J 965 with Smc5                         |                     |
| J 1874                | J 965 with Csm1                         |                     |
| J 1875                | J 965 with Lrs4                         |                     |
| J 048                 | J 1493 with Smc5                        |                     |
| J 063                 | J 1493 with Nse6                        |                     |
| J 050                 | J 1493 with Mms21                       |                     |
| J 1881                | J 1493 with Heh1                        |                     |
| J 187                 | pFN4 pNOP1-CFP                          | 1742 S. Gasser lab  |
| J 1830                | pNOY373, containing 9.1 Kb rDNA repeats | (Unal et al., 2011) |

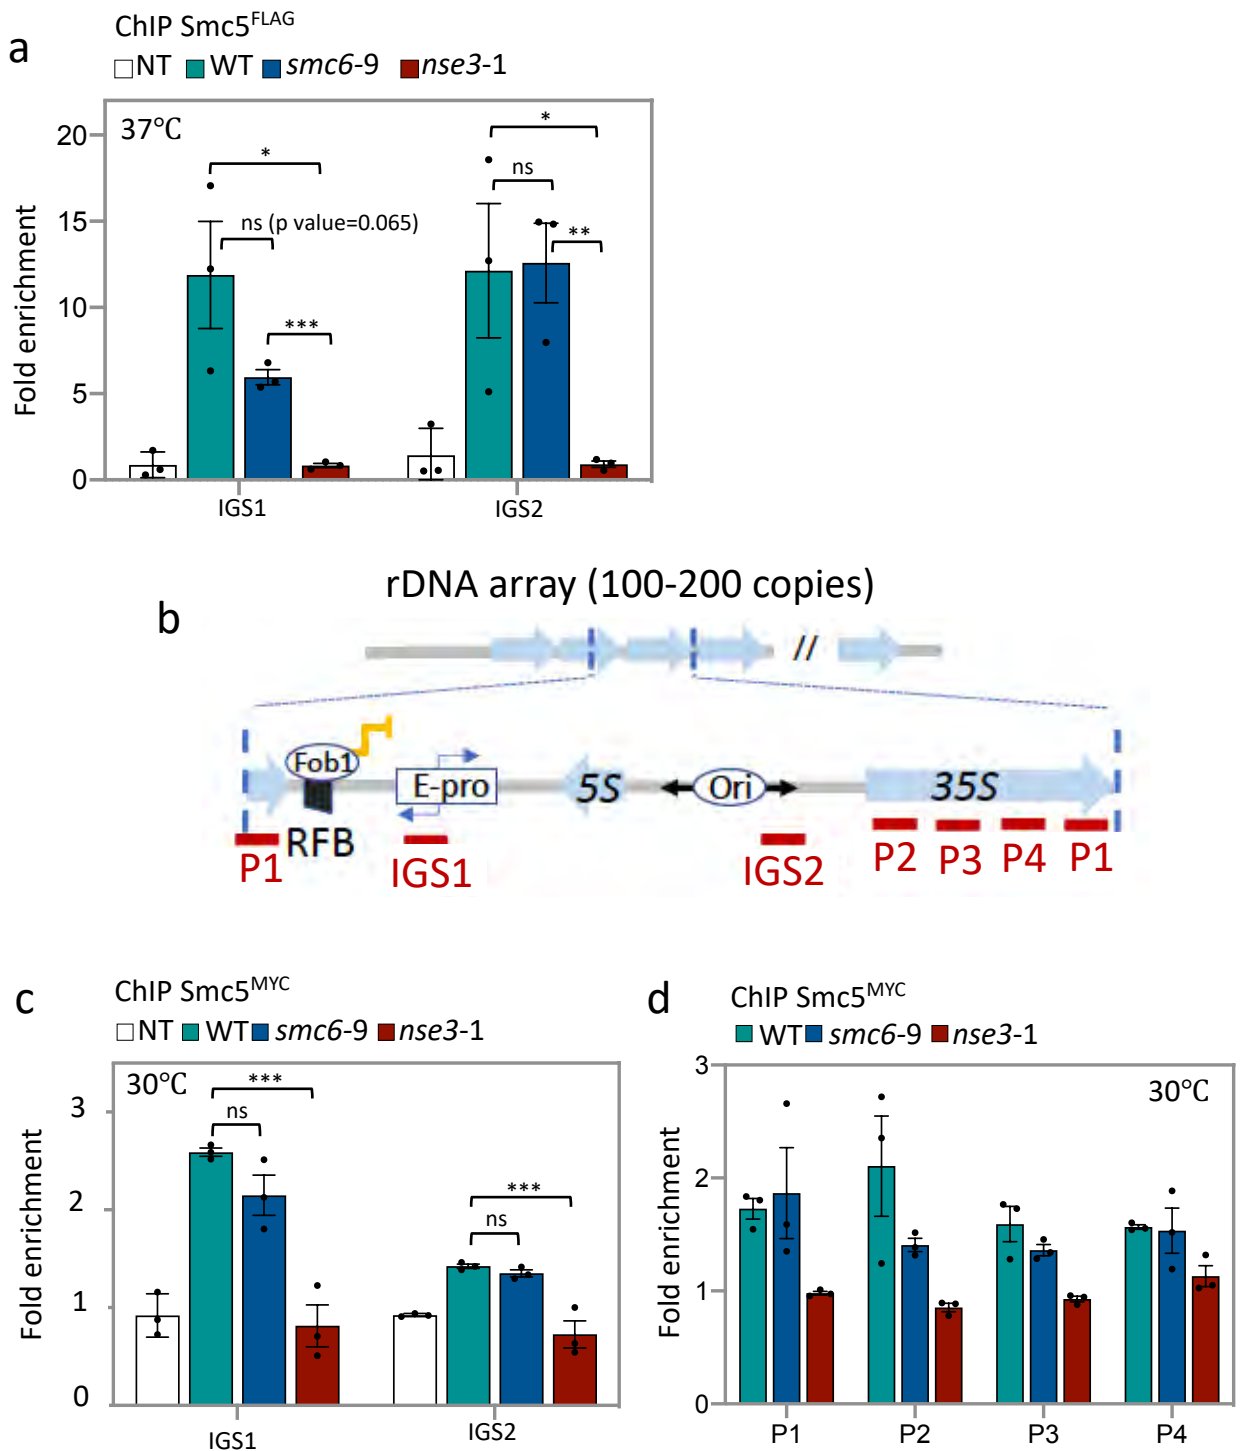

### Supplementary Figure 1, Related to Figure 1.

**a.** Enrichment of Smc5<sup>MYC</sup> at IGS1 and IGS2 with  $\alpha$ -FLAG at 37°C in non-tagged control (JC 470), WT (JC 3728), *nse3-1* (JC 5879) and *smc6-9* (JC 5894). Fold enrichment is based on normalization to negative control region as described in Fig.1. Analysis was performed using at least three biological replicates. Statistical analysis is described in methods.

**b.** Location of P1-P4 probes in the rDNA.

**c., d.** Enrichment of Smc5<sup>MYC</sup> at IGS1 and IGS2 (b) or P1-P4 (c) by ChIP with  $\alpha$ -MYC at 30°C in non-tagged control (JC 470), WT (JC 3467), *nse3-1* (JC 3483) and *smc6-9* (JC 5039).

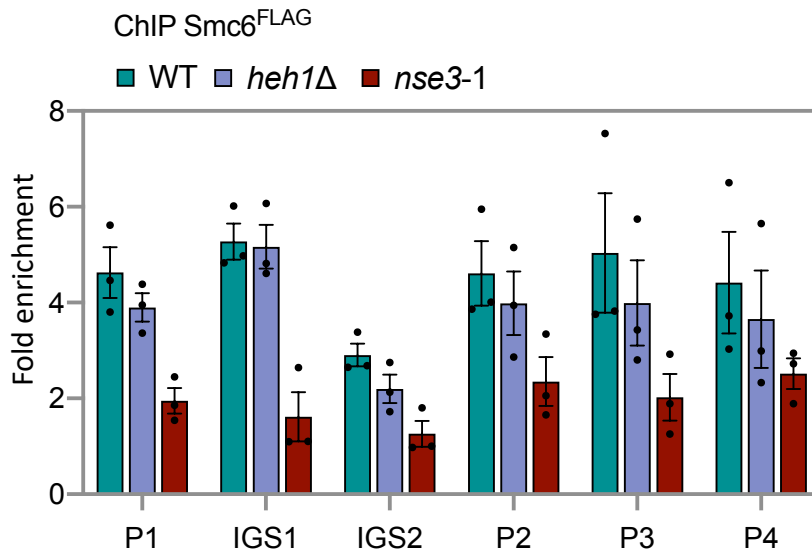

**Supplementary Figure 2, Related to Figure 2.**

Enrichment of Smc6<sup>FLAG</sup> at IGS1 and IGS2 by ChIP with  $\alpha$ -FLAG in WT (JC 1595), *heh1*Δ (JC 4205) and *nse3-1* (JC 3078). Fold enrichment is based on normalization to negative control region as described in Fig.1. Analysis was performed using at least three biological replicates. Statistical analysis is described in methods.

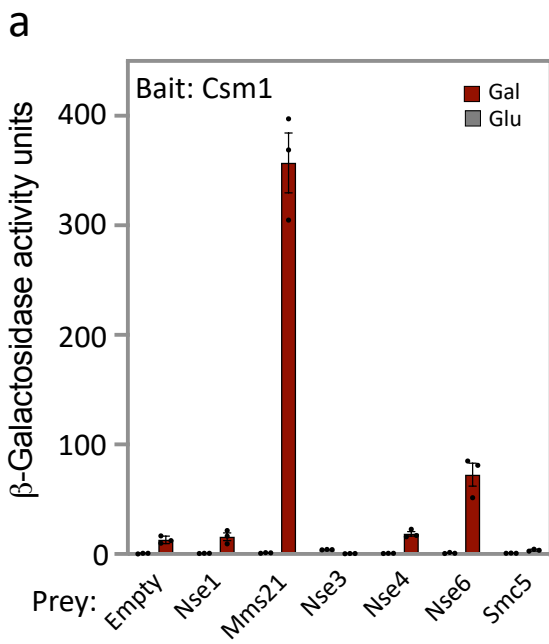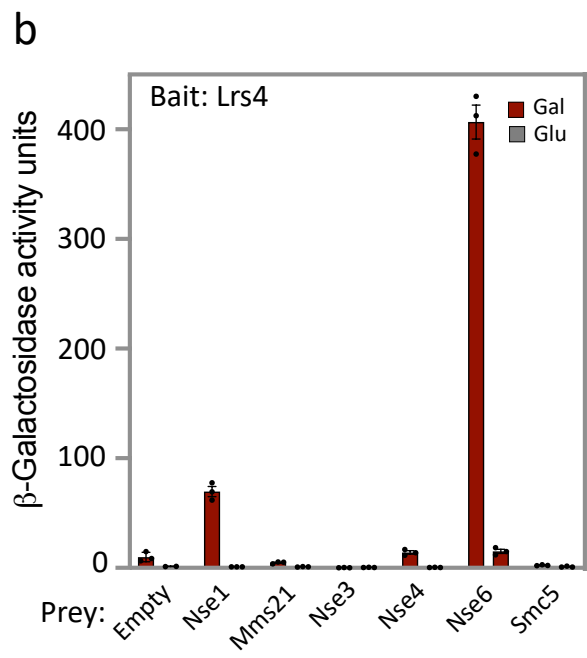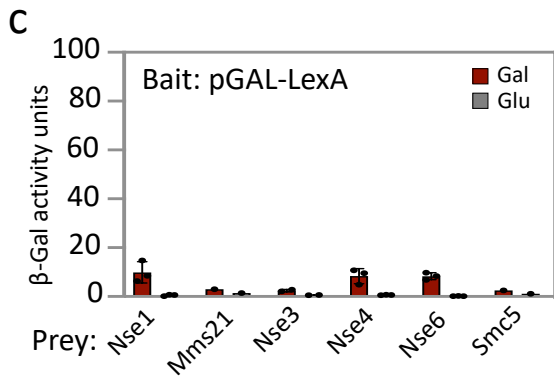

**d** Prey protein expression in pJG4-6 HA plasmid.

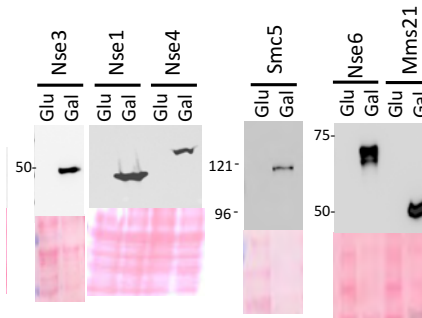

**e** Bait protein expression in pGAL-LexA plasmid.

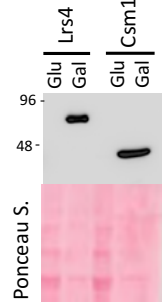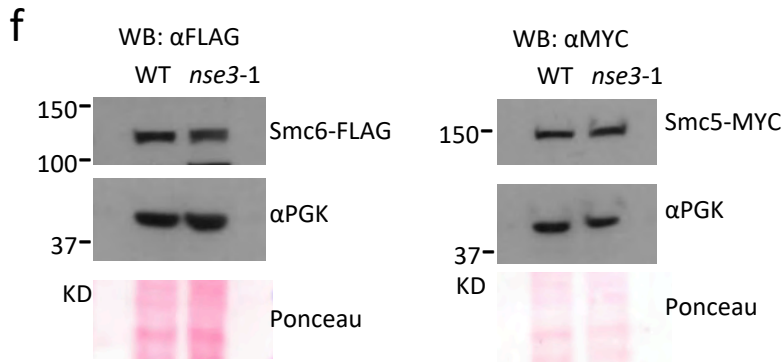



**Supplementary Figure 3, Related to Figure 3.**

**a., b.** Yeast two-Hybrid analysis between Smc5/6 (Nse1, Mms21, Nse3 Nse4, Nse6 and Smc5) as prey vectors and Cohibin components (a) Csm1 or (b) Lrs4 as bait vectors.

**c.** Smc5/6 components as preys (Nse1, Mms21, Nse3 Nse4, Nse6 and Smc5) with empty vector (pGAL-LexA) control represent background  $\beta$ -galactosidase activity units.

**d., e.** Western blots with (d)  $\alpha$ -HA and (e)  $\alpha$ -LexA shows the expression levels of proteins with their corresponding epitope tags from Yeast-two hybrid vectors after induction in Galactose-containing media in comparison with Glucose-containing media as control. Glu: Glucose; Gal: Galactose. The expression vectors are listed in Table S3.

**f.** Western blots with  $\alpha$ -FLAG for Smc6<sup>FLAG</sup> in WT (JC 1595) and *nse3-1* (3078) used for ChIP in Fig. 3f, 3g and  $\alpha$ -MYC for Smc5<sup>MYC</sup> in WT (JC 3467) and *nse3-1* (3483) used for ChIP in Supplementary Fig. 1a,b.

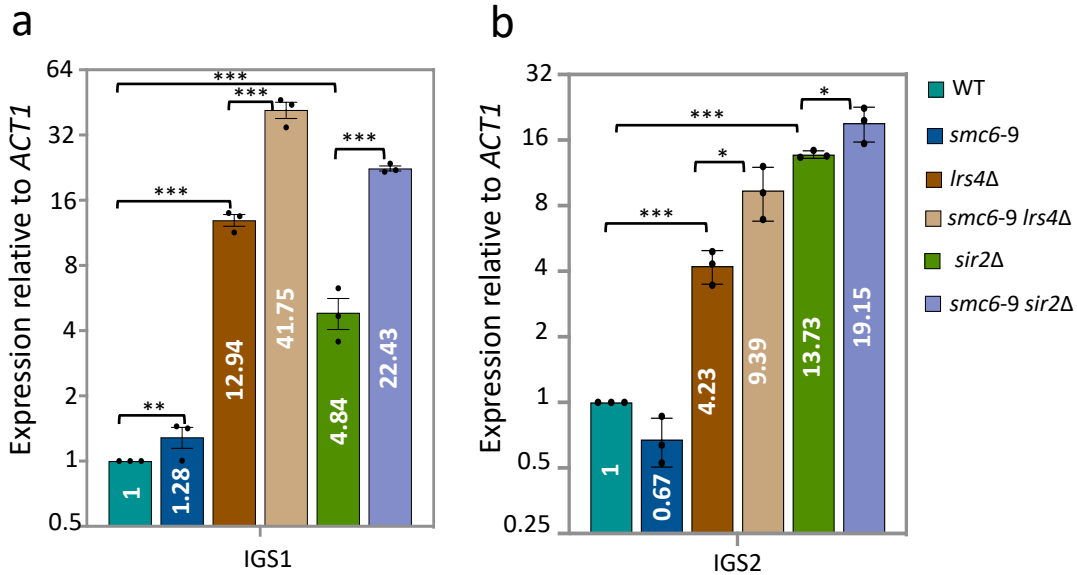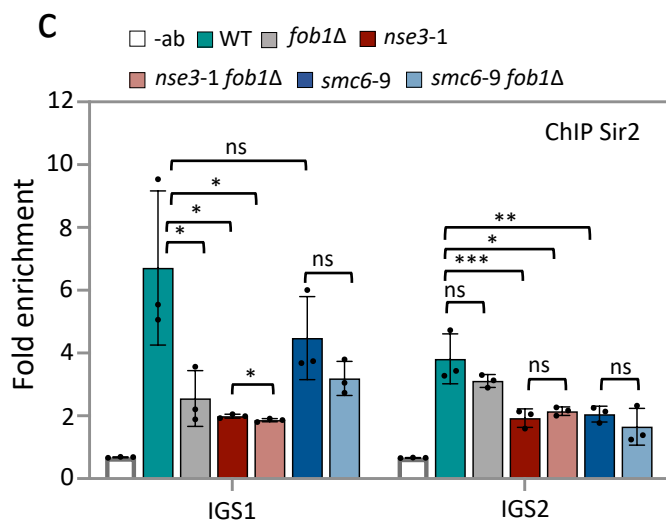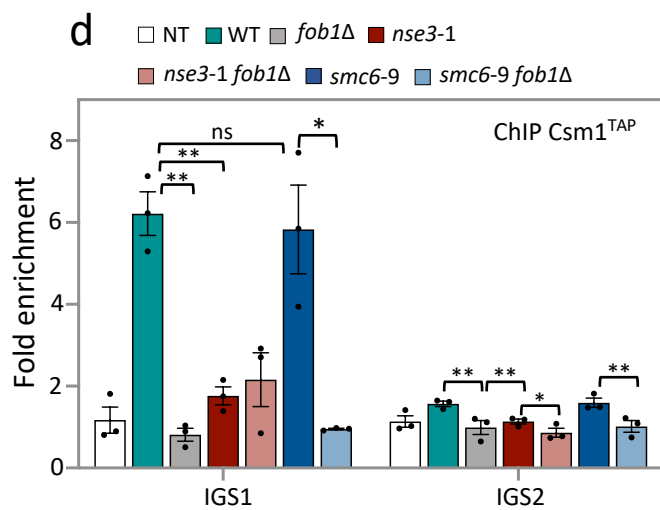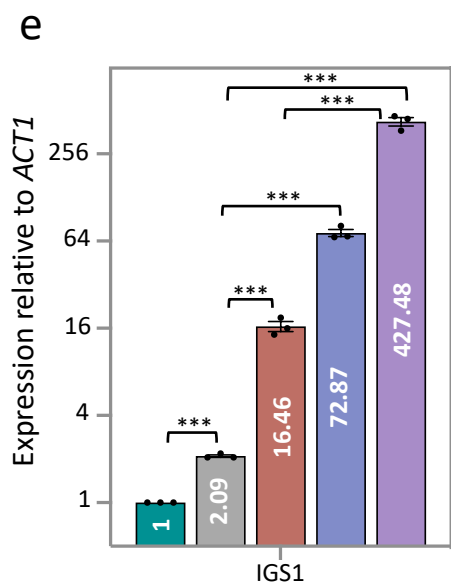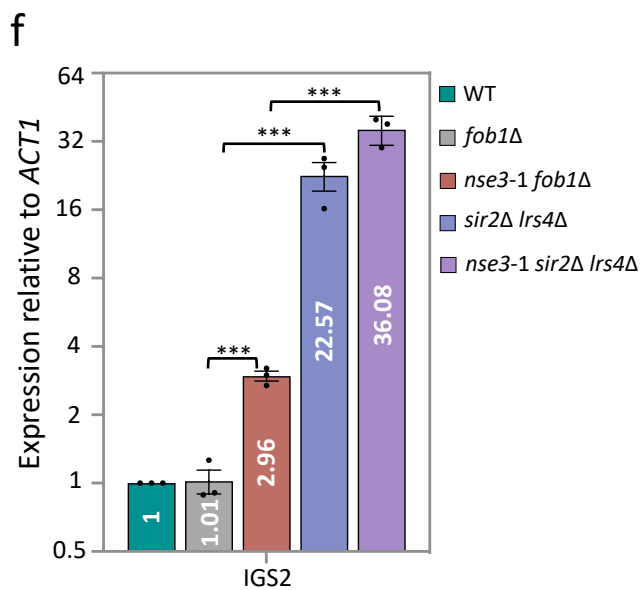

**Supplementary Figure 4, Related to Figures 3 and 4.**

**a., b.** Transcription of (a) IGS1 and (b) IGS2 measured and represented as relative to WT cells after normalization to *ACT1* expression for WT (JC 471), *smc6-9* (JC 1358), *lrs4Δ* (JC 3791), *smc6-9 lrs4Δ* (JC 4976), *sir2Δ* (JC 4648) and *smc6-9 sir2Δ* (JC 4978) strains.

**c.** Enrichment of Sir2 at IGS1 and IGS2 by ChIP with  $\alpha$ -Sir2 in WT (JC 471), *fob1Δ* (4825), *nse3-1*(JC 3032), *nse3-1 fob1Δ* (JC 4595), *smc6-9* (JC 1358) and *smc6-9 fob1Δ* (JC 4824). Fold enrichment is based on normalization to negative control region relative to no antibody control.

**d.** Enrichment of Csm1<sup>TAP</sup> at IGS1 and IGS2 by ChIP with  $\alpha$ -TAP in Non-tagged control (JC 470), WT (JC 4233), *fob1Δ* (JC 4937), *nse3-1* (JC 4251), *nse3-1 fob1Δ* (JC 4973), *smc6-9* (JC 4938) and *smc6-9 fob1Δ* (JC 4929) at IGS1 and IGS2. Fold enrichment is based on normalization to negative control region as described in Fig.1. Analysis was performed using at least three biological replicates. Statistical analysis is described in methods.

**e., f.** Transcription of (e) IGS1 and (f) IGS2 measured and represented as relative to WT cells after normalization to *ACT1* expression for WT (JC 471), *fob1Δ* (JC 4825), *nse3-1 fob1Δ* (JC 4595), *sir2Δ lrs4Δ* (JC 4979), *nse3-1 sir2Δ lrs4Δ* (JC 4980) strains.

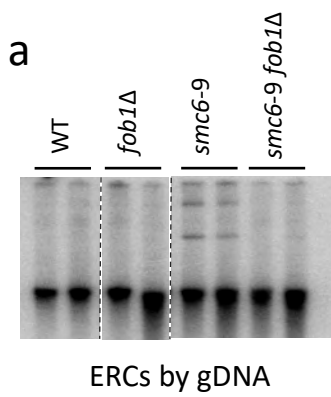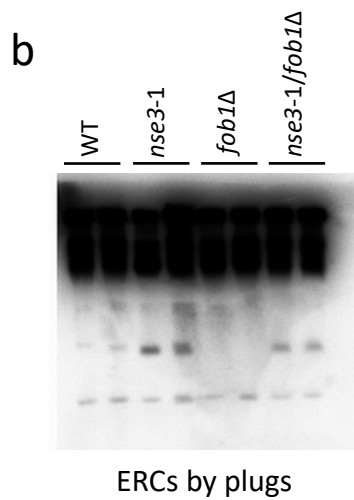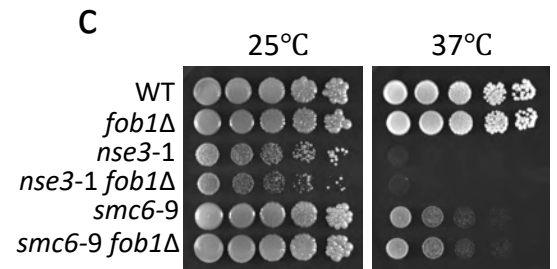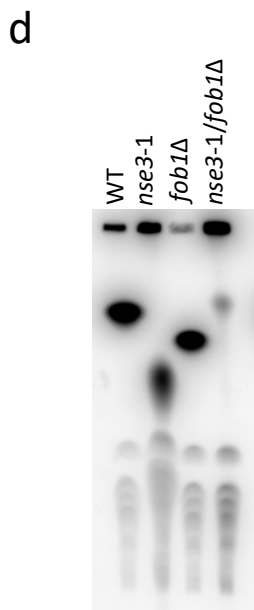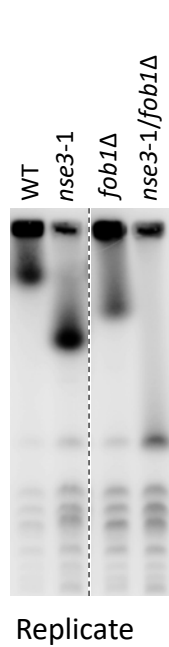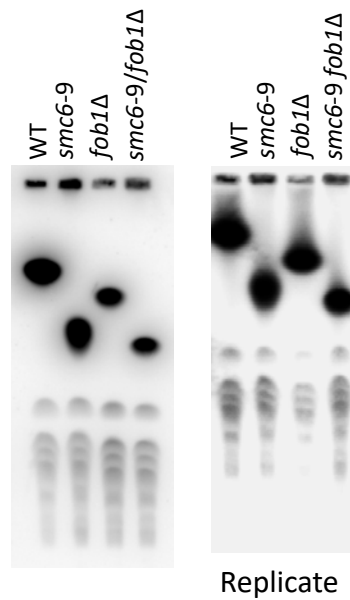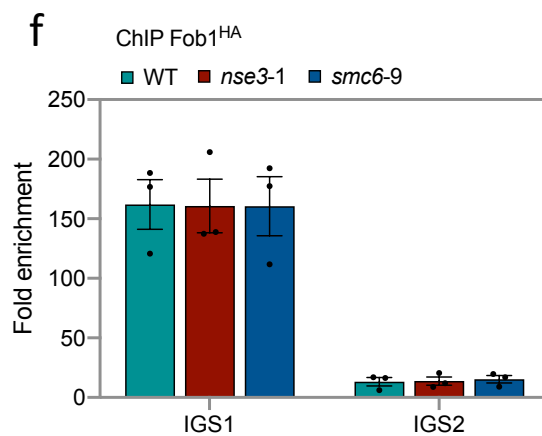

### Supplementary Fig. 5, Related to Figure 4.

**a.** ERCs for WT (JC 470, JC 471), *fob1* $\Delta$  (JC 4825, JC 4825), *smc6-9* (JC 1358, JC 3039) and *smc6-9 fob1* $\Delta$  (JC 4824, JC 4823) strains were visualized by running  $\cong$  10ug gDNA at low voltage for  $\cong$  24hours followed by southern blotting and probing for rDNA repeats.

**b.** ERCs for WT (JC 470, JC 471), *nse3-1*(JC 3032, JC 3084), *fob1* $\Delta$  (JC 4825, JC 4825) and *nse3-1 fob1* $\Delta$  (JC 5882, JC 5883) strains were visualized by running plugs containing  $5 \times 10^7$  cells/plug at low voltage for  $\cong$  24hours followed by southern blotting and probing for rDNA repeats.

**c.** Drop assay to check the temperature sensitivity of the strains - WT (JC 471), *fob1* $\Delta$  (JC 4825), *nse3-1*(JC 3032), *nse3-1 fob1* $\Delta$  (JC 4595), *smc6-9* (JC 1358) and *smc6-9 fob1* $\Delta$  (JC 4824) on YPAD at 37°C.

**d., e.** rDNA repeats for WT (JC 471), *fob1* $\Delta$  (JC 4825), *nse3-1*(JC 3032), *nse3-1 fob1* $\Delta$  (JC 4595), *smc6-9* (JC 1358) and *smc6-9 fob1* $\Delta$  (JC 4824) strains were visualized by PFGE, followed with southern blotting and probing for rDNA repeats. Independent replicate experiments were performed.

**f.** Enrichment of Fob1<sup>HA</sup> at IGS1 and IGS2 by ChIP with  $\alpha$ -HA in WT (JC 5007), *nse3-1* (JC 5008) and *smc6-9* (JC 5010). Fold enrichment is based on normalization to negative control region (ZN). Analysis was performed using at least three biological replicates. Statistical analysis is described in methods.

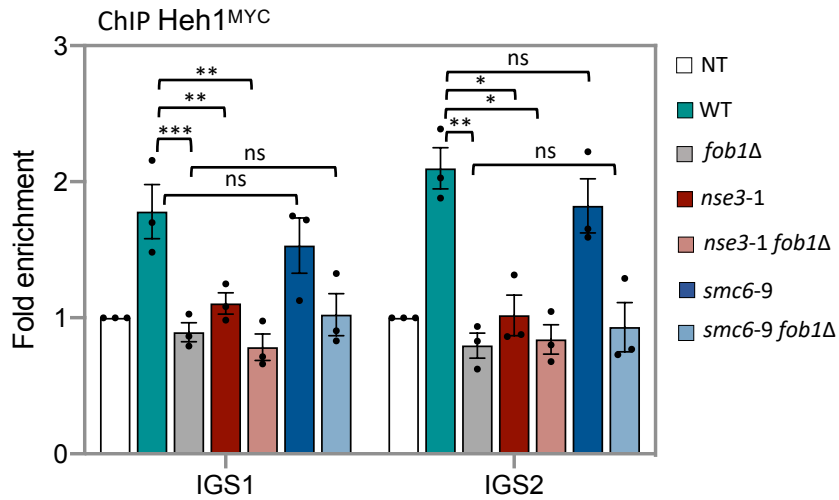

### Supplementary Fig. 6.

Enrichment of Heh1<sup>MYC</sup> at IGS1 and IGS2 by ChIP with  $\alpha$ -MYC in non-tagged control (JC 470), WT (JC 4022), *fob1*Δ (JC 4940), *nse3-1* (JC 4228), *nse3-1 fob1*Δ (JC 4975), *smc6-9* (JC 4942) and *smc6-9 fob1*Δ (JC 4943) at IGS1 and IGS2. Fold enrichment is based on normalization to negative control region relative to non-tagged control. Analysis was performed using at least three biological replicates. Statistical analysis is described in methods.
